# Supplementary material for: Evaluating L1CAM expression in human endometrial cancer using qRT-PCR
Source: PubMed Central journal article supplement (PMC5130004; doi:10.18632/oncotarget.9574), 2016-05-24
Supplement: oncotarget-07-40221-s001.pdf [file oncotarget-07-40221-s001.pdf]

## Evaluating L1CAM expression in human endometrial cancer using qRT-PCR

### SUPPLEMENTARY FIGURE AND TABLES

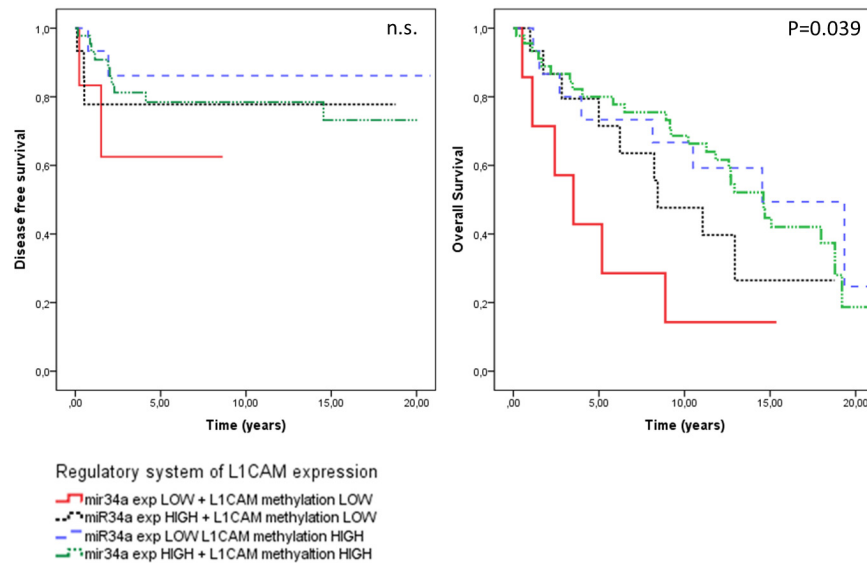

**Supplementary Figure S1: Survival curves based on the L1CAM regulation systems.** Kaplan Mayer curves for PFS and OS are depicted in four groups on patients which are the follows: negative and positive for miR-34a expression (25th percentile as cut off level) and negative and positive for L1CAM promoter methylation (cut off set at 29th percentile). Log rank test was applied.

Supplementary Table S1: L1CAM vales based on percentiles

| Value | Frequency | Percent | Cumulative Percent |
|-------|-----------|---------|--------------------|
| .00   | 5         | 6.1     | 6.1                |
| .01   | 31        | 37.8    | 43.9               |
| .02   | 13        | 15.9    | 59.8               |
| .03   | 5         | 6.1     | 65.9               |
| .04   | 5         | 6.1     | 72.0               |
| .05   | 2         | 2.4     | 74.4               |
| .06   | 3         | 3.7     | 78.0               |
| .07   | 1         | 1.2     | 79.3               |
| .08   | 2         | 2.4     | 81.7               |
| .09   | 1         | 1.2     | 82.9               |
| .10   | 2         | 2.4     | 85.4               |
| .12   | 1         | 1.2     | 86.6               |
| .13   | 2         | 2.4     | 89.0               |
| .41   | 1         | 1.2     | 90.2               |
| .44   | 1         | 1.2     | 91.5               |
| .51   | 1         | 1.2     | 92.7               |
| .52   | 2         | 2.4     | 95.1               |
| .56   | 1         | 1.2     | 96.3               |
| 1.54  | 1         | 1.2     | 97.6               |
| 3.49  | 1         | 1.2     | 98.8               |
| 4.06  | 1         | 1.2     | 100.0              |
| Total | 82        | 100.0   |                    |

The large majority of the endometrial cancer samples L1CAM expression was either absent or very weak. A pronounced increment in the L1CAM expression was observed in nine cases (89<sup>th</sup> percentile), This let us to set the arbitrary threshold at 0.41 to distinguish between L1CAM positivity and negativity.

Supplementary Table S2: Inhibiting mechanism of L1CAM expression (miR-34a expression and L1CAM promoter methylation) grouped with regard to their respective activity (high or low)

| miR-34a expression | L1CAM methylation | n. | L1CAM expression (median) § | p-value* |
|--------------------|-------------------|----|-----------------------------|----------|
| low                | low               | 7  | 0.06                        | 0.011    |
| low                | high              | 15 | 0.04                        |          |
| high               | low               | 15 | 0.04                        |          |
| high               | high              | 45 | 0.01                        |          |

Median value of L1CAM expression are given for the form possible constellations. Cut off for miR-34a expression: 25<sup>th</sup> percentile, for L1CAM methylation: 29<sup>th</sup> percentile.

§ arbitrary units normalized to TBP.

\* Kruskal Wallis test.
